# Supplementary material
Source: PubMed Central journal article supplement (PMC3899801)
Supplement: NIHMS396825-supplement-2.pdf [file NIHMS396825-supplement-2.pdf]

## Real-time PCR

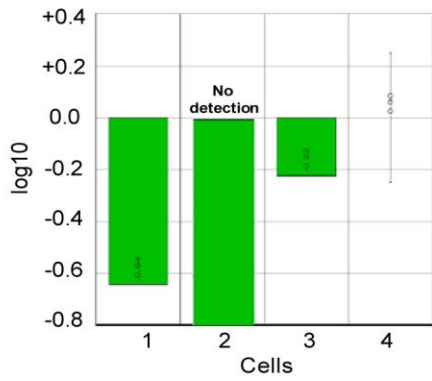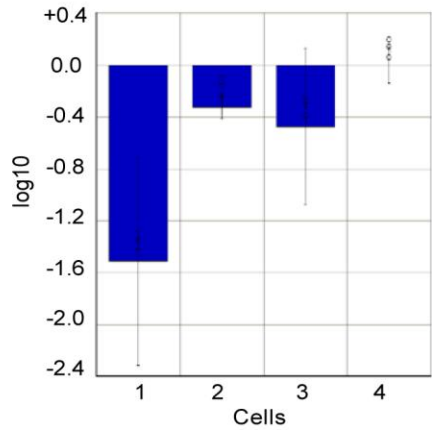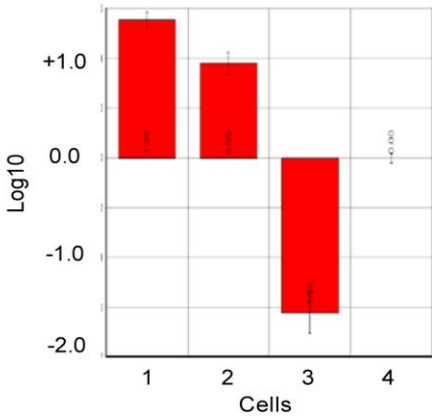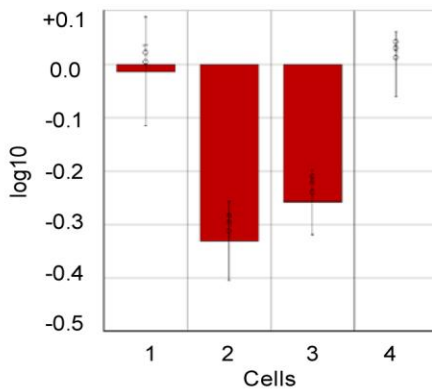

## Western Blot

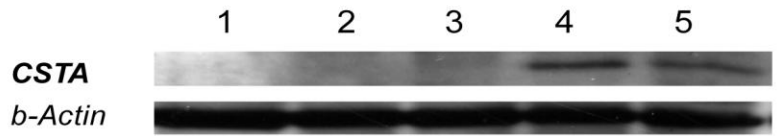

Key Samples

1. hairpin I-A7
2. hairpin I-A9
3. hairpin I-D4
4. hairpin RFP Control
5. Parental DCIS.COM

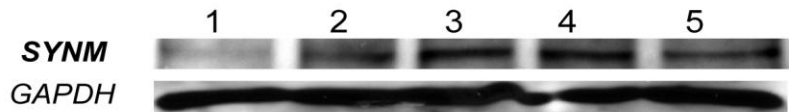

Key Samples

1. hairpin III-C2
2. hairpin III-C3
3. hairpin III-C5
4. hairpin RFP-1 Control
5. Parental DCIS.COM

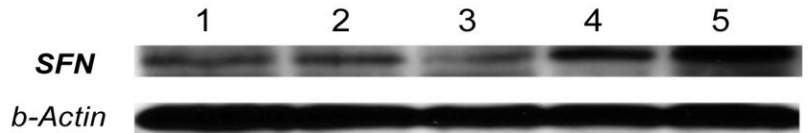

Key Samples

1. hairpin II-B10
2. hairpin II-B11
3. hairpin II-C4
4. hairpin RFP Control
5. Parental DCIS.COM

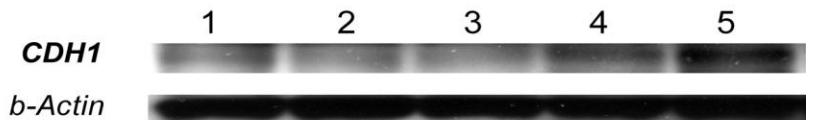

Key Samples

1. hairpin II-B5
2. hairpin II-B6
3. hairpin II-B7
4. hairpin RFP Control
5. Parental DCIS.COM

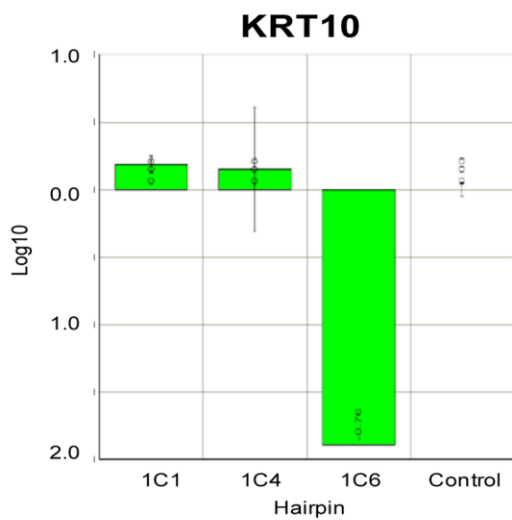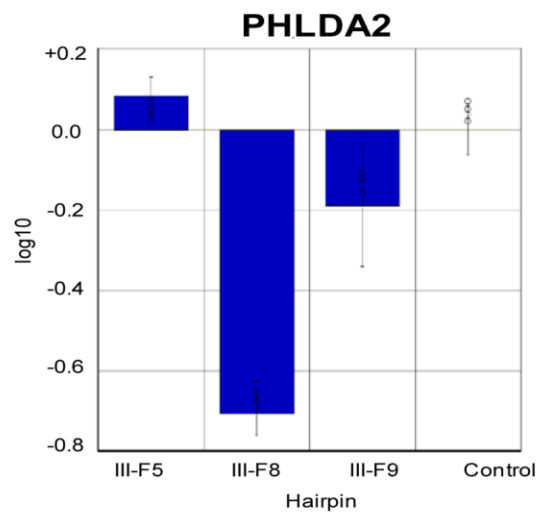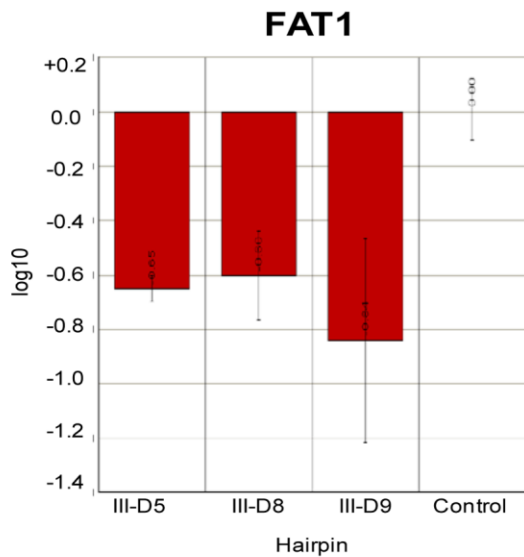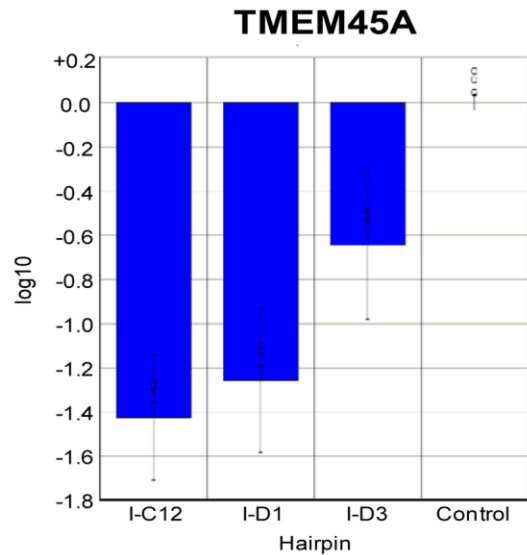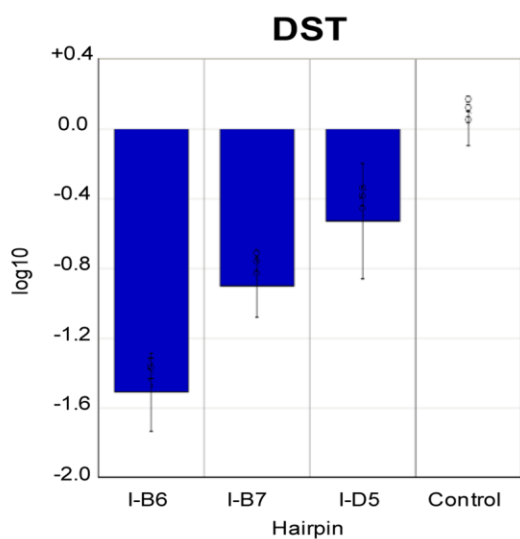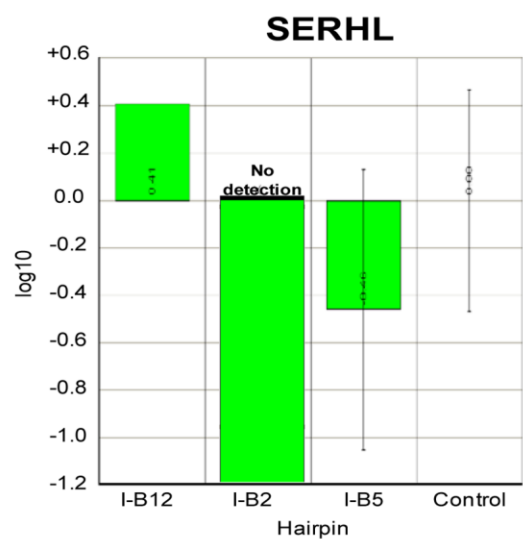

**Supplementary Figure S2. Knockdown Efficiency of shRNAi in DCIS.COM.** Depletion of target gene expression by 3 independent shRNAi per gene was validated using qRT-PCR and western blot
