# Supplementary material
Source: PubMed Central journal article supplement (PMC3899801)
Supplement: NIHMS396825-supplement-3.pdf [file NIHMS396825-supplement-3.pdf]

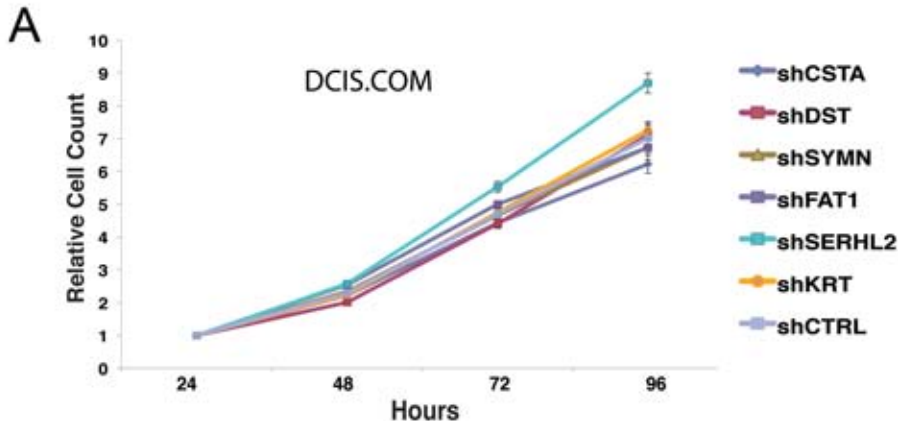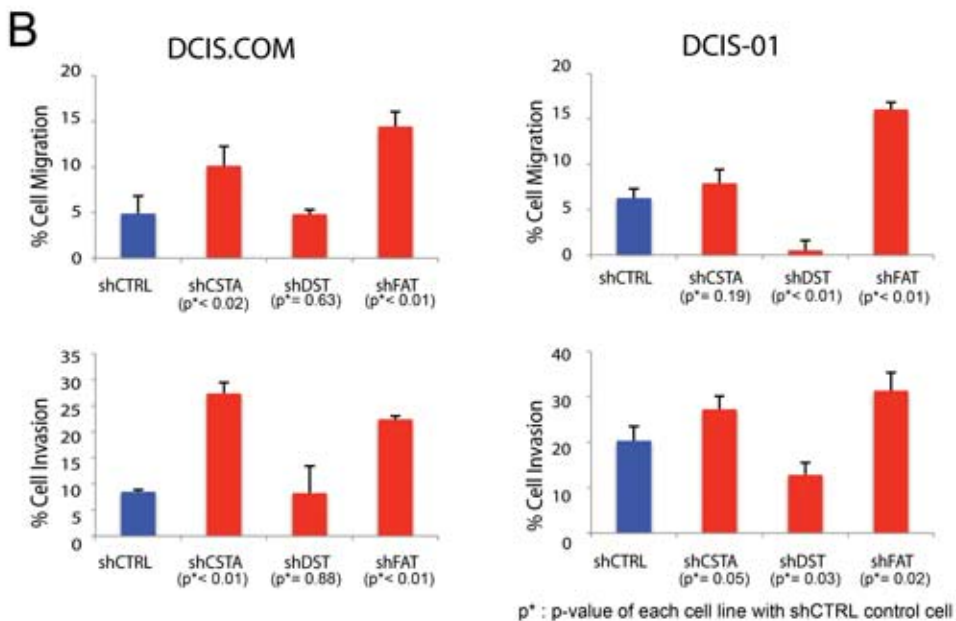

**Supplementary Figure S3.** Impact of gene knockdown on the ability to cells to grow in monolayer culture (A) and to migrate/invade through Boydon chamber in DCIS.COM and h.DCIS.01 cells (B).
