# Supplementary material
Source: PubMed Central journal article supplement (PMC3899801)
Supplement: NIHMS396825-supplement-4.pdf [file NIHMS396825-supplement-4.pdf]

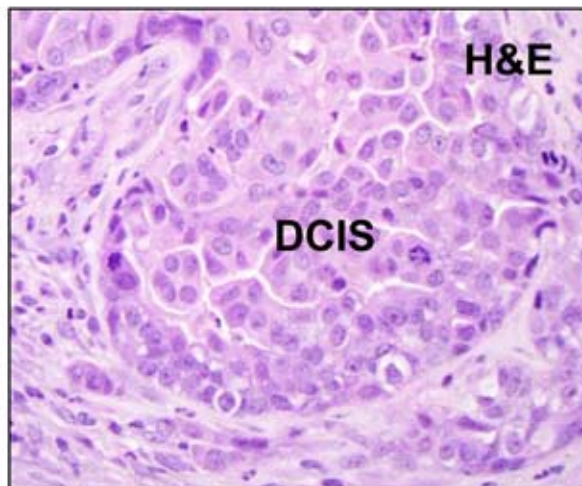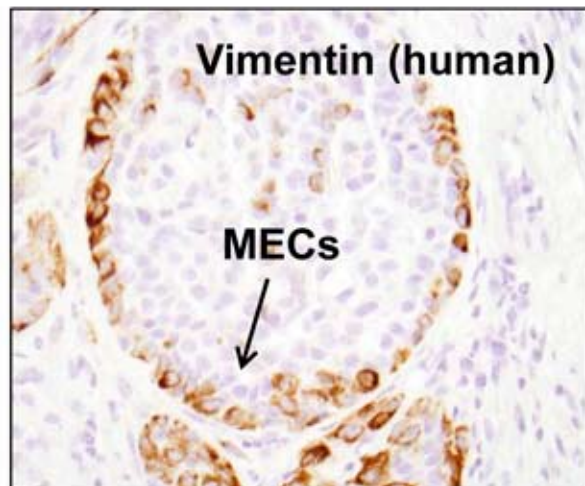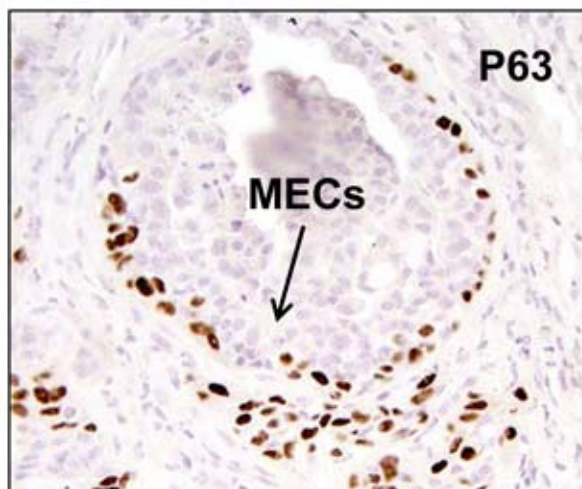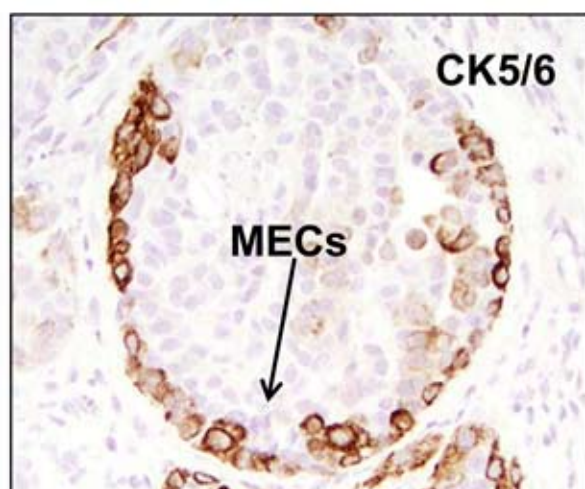

Supplementary Figure S4. Representative photographs of DCIS in MIND xenografts of DCIS.COM immunostained with antibodies recognizing myoepithelial cells. Note that vimentin, p63, and CK5/6 localize to the same single layer of cells at the interface with the basement membrane. The vimentin antibody utilized is specific for the human protein, indicating that DCIS.COM cells somehow displace the normal mouse myoepithelium and make their own (i.e. differentiate into myoepithelium and luminal tumor epithelium). The ability to differentiate into these two cell types was also shown by SUM225 and h.DCIS.01 MIND xenografts (not shown).
